# Supplementary material for: Genome-Wide Association Study Reveals Novel QTLs and Candidate Genes for Grain Number in Rice
Source: MDPI journal article supplement (doi:10.3390/ijms232113617), 2022-11-06
Supplement: s1 [file s1]

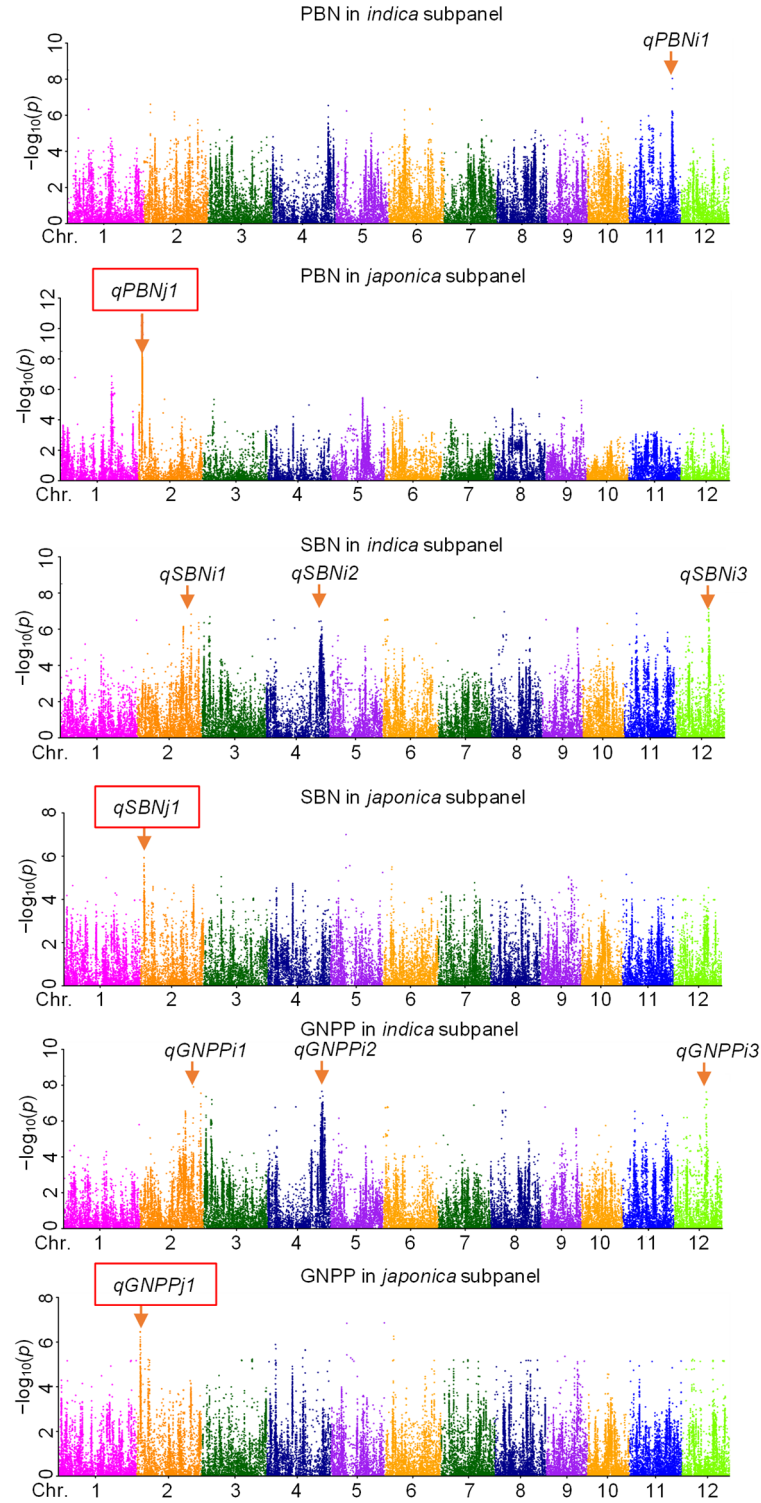

**Figure S1.** GWAS for PBN, SBN, and GNPP in *indica* subpanel and *japonica* subpanel. Manhattan plots of GWAS for PBN (A), SBN (C), and GNPP (E) in *indica* subpanel. Manhattan plots of GWAS for PBN (B), SBN (D), and GNPP (F) in *japonica* subpanel. The red boxes indicate three overlapped QTLs.

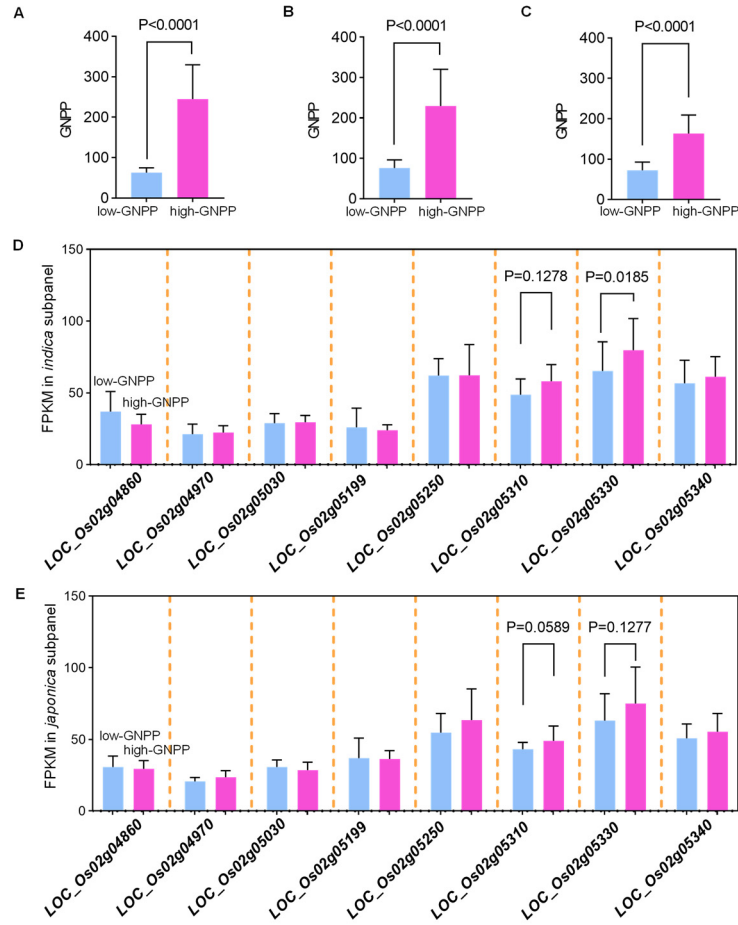

**Figure S2.** The mean expression levels of eight candidate genes in young panicles of *indica* accessions and *japonica* accessions. (A) Comparison of GNPP between ten high-GNPP and ten low-GNPP accessions from 468 rice accessions. (B) Comparison of GNPP between ten high-GNPP and ten low-GNPP accessions from *indica* subpanel. (C) Comparison of GNPP between ten high-GNPP and ten low-GNPP accessions from *japonica* subpanel. (D) The expression levels of eight candidate genes in young panicles of ten high-GNPP and ten low-GNPP accessions from *indica* subpanel. (E) The expression levels of eight candidate genes in young panicles of ten high-GNPP and ten low-GNPP accessions from *japonica* subpanel. Data represent mean  $\pm$  SD (n=10). The p-value is obtained from the T-test.

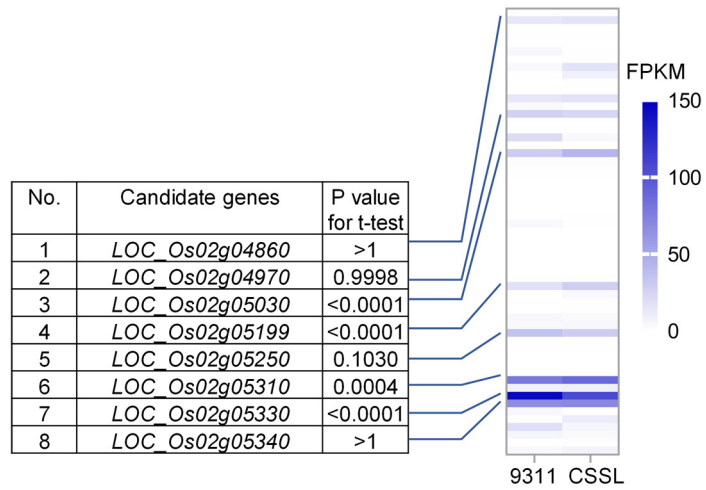

**Figure S3.** Comparison of the expression levels of 57 genes in *qPSG1* between 9311 and CSSL29. Data represent mean FPKM values from three biological replicates. The p-value is obtained from the T-test.



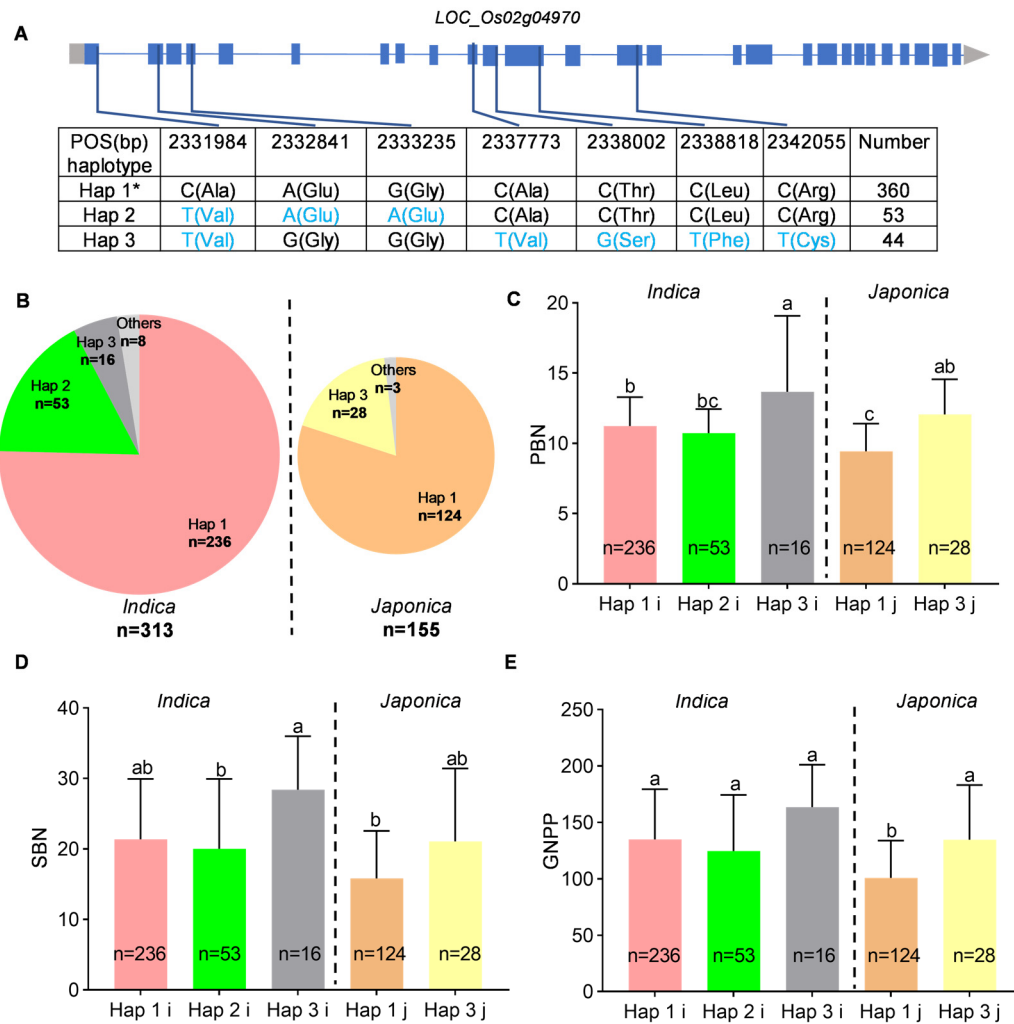

**Figure S5.** Haplotype analysis of *LOC\_Os02g04970*. (A) Schematic representation of *LOC\_Os02g04970* structure and the positions of seven nonsynonymous SNPs used for haplotype analysis. SNPs that differ from the reference sequence are marked with blue letters. (B) The haplotype frequency distribution of *LOC\_Os02g04970* in two subpanels, *indica* and *japonica*. (C) Comparison of PBN among accessions with different haplotypes in two subpanels, *indica* and *japonica*. (D) Comparison of SBN among accessions with different haplotypes in two subpanels, *indica* and *japonica*. (E) Comparison of GNPP among accessions with different haplotypes in two subpanels, *indica* and *japonica*. \* indicates the haplotype is the same as NPB. Others in the pie-chart mean the haplotypes with a frequency of less than ten. The i and j behind Hap in (C-E) indicate *indica* accessions and *japonica* accessions with relevant haplotypes, respectively. Different lowercase letters indicate significant differences among accessions with different haplotypes based on Duncan's new multiple-range test ( $p < 0.05$ ).

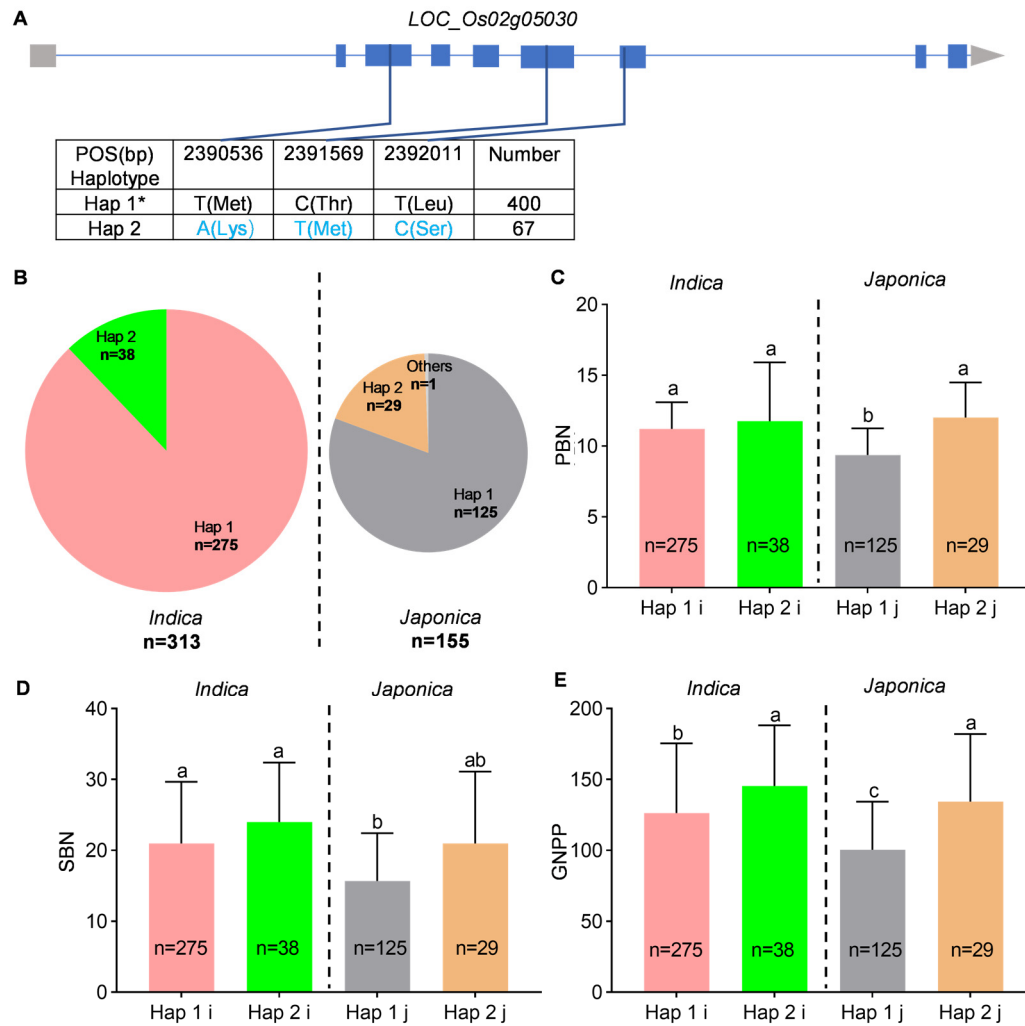

**Figure S6.** Haplotype analysis of *LOC\_Os02g05030*. (A) Schematic representation of *LOC\_Os02g05030* structure and the positions of three nonsynonymous SNPs used for haplotype analysis. SNPs that differ from the reference sequence are marked with blue letters. (B) The haplotype frequency distribution of *LOC\_Os02g05030* in two subpanels, *indica* and *japonica*. (C) Comparison of PBN among accessions with different haplotypes in two subpanels, *indica* and *japonica*. (D) Comparison of SBN among accessions with different haplotypes in two subpanels, *indica* and *japonica*. (E) Comparison of GNPP among accessions with different haplotypes in two subpanels, *indica* and *japonica*. \* indicates the haplotype is the same as NPB. Others in the pie-chart mean the haplotypes with a frequency of less than ten. The i and j behind Hap in (C-E) indicate *indica* accessions and *japonica* accessions with relevant haplotypes, respectively. Different lowercase letters indicate significant differences among accessions with different haplotypes based on Duncan's new multiple-range test ( $p < 0.05$ ).

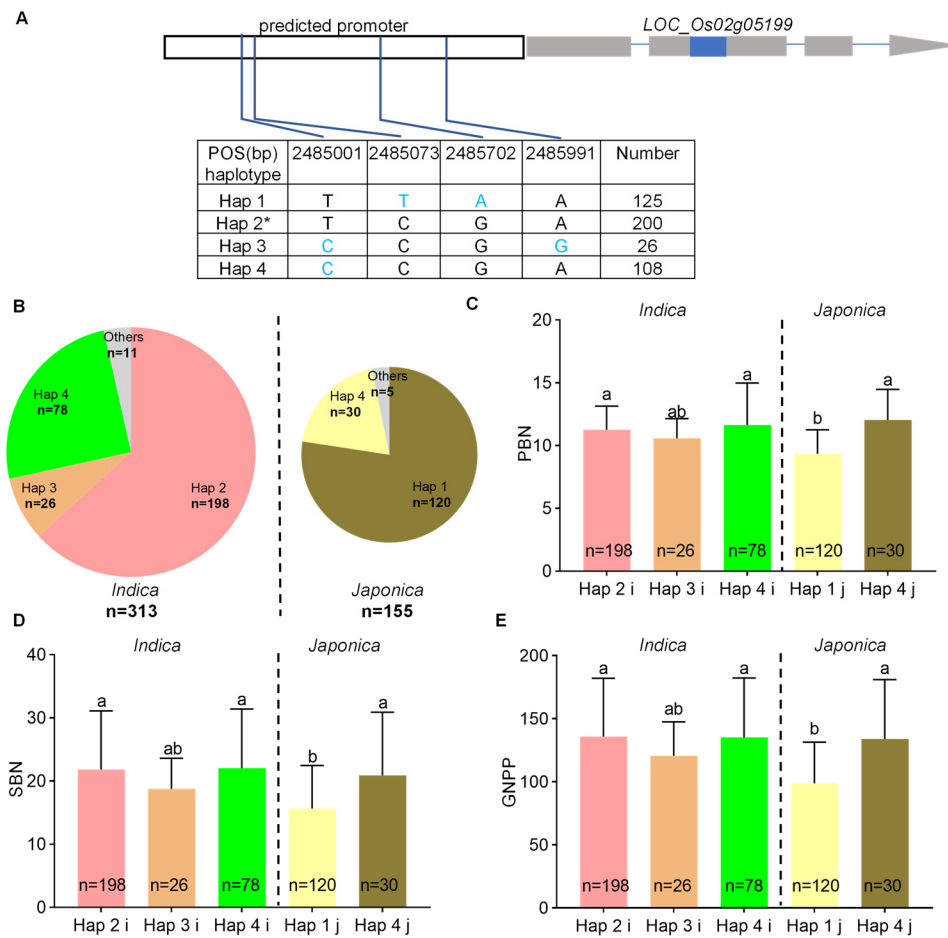

**Figure S7.** Haplotype analysis of *LOC\_Os02g05199*. (A) Schematic representation of *LOC\_Os02g05199* structure and the positions of four SNPs used for haplotype analysis. SNPs that differ from the reference sequence are marked with blue letters. (B) The haplotype frequency distribution of *LOC\_Os02g05199* in two subpanels, *indica* and *japonica*. (C) Comparison of PBN among accessions with different haplotypes in two subpanels, *indica* and *japonica*. (D) Comparison of SBN among accessions with different haplotypes in two subpanels, *indica* and *japonica*. (E) Comparison of GNPP among accessions with different haplotypes in two subpanels, *indica* and *japonica*. \* indicates the haplotype is the same as NPB. Others in the pie-chart mean the haplotypes with a frequency of less than ten. The i and j behind Hap in (C-E) indicate *indica* accessions and *japonica* accessions with relevant haplotypes, respectively. Different lowercase letters indicate significant differences among accessions with different haplotypes based on Duncan's new multiple-range test ( $p < 0.05$ ).

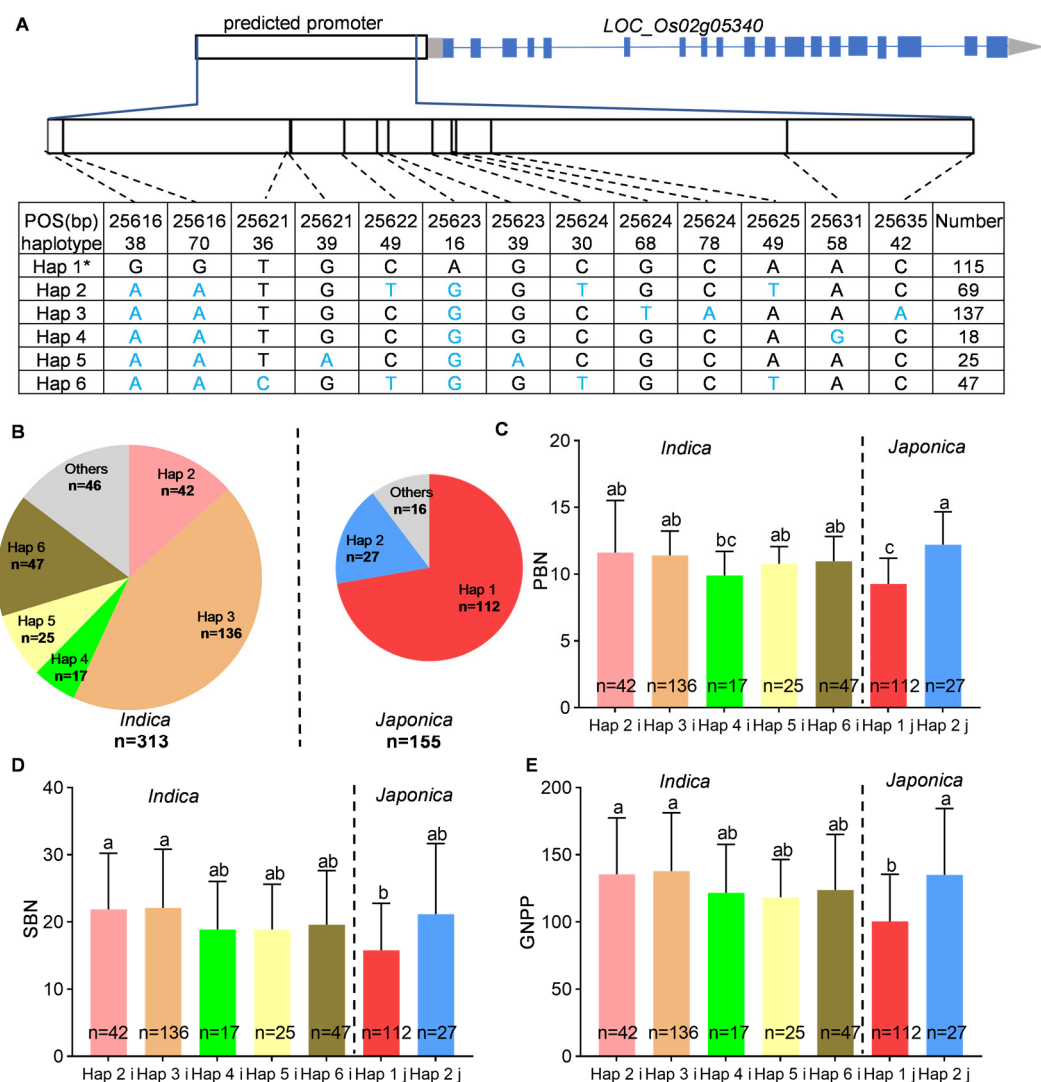

**Figure S8.** Haplotype analysis of *LOC\_Os02g05340*. (A) Schematic representation of *LOC\_Os02g05340* structure and the positions of 13 SNPs used for haplotype analysis. SNPs that differ from the reference sequence are marked with blue letters. (B) The haplotype frequency distribution of *LOC\_Os02g05340* in two subpanels, *indica* and *japonica*. (C) Comparison of PBN among accessions with different haplotypes in two subpanels, *indica* and *japonica*. (D) Comparison of SBN among accessions with different haplotypes in two subpanels, *indica* and *japonica*. (E) Comparison of GNPP among accessions with different haplotypes in two subpanels, *indica* and *japonica*. \* indicates the haplotype is the same as NPB. Others in the pie-chart mean the haplotypes with a frequency of less than ten. The i and j behind Hap in (C-E) indicate *indica* accessions and *japonica* accessions with relevant haplotypes, respectively. Different lowercase letters indicate significant differences among accessions with different haplotypes based on Duncan's new multiple-range test ( $p < 0.05$ ).



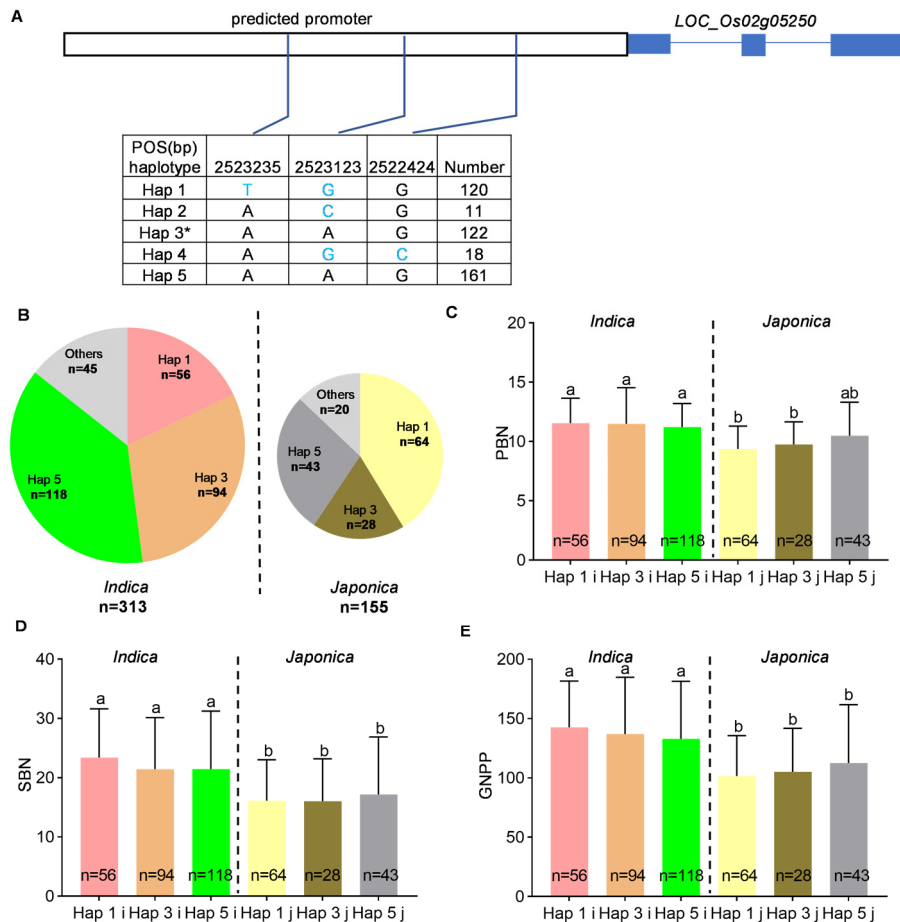

**Figure S9.** Haplotype analysis of *LOC\_Os02g05250*. (A) Schematic representation of *LOC\_Os02g05250* structure and the positions of three SNPs used for haplotype analysis. SNPs that differ from the reference sequence are marked with blue letters. (B) The haplotype frequency distribution of *LOC\_Os02g05250* in two subpanels, *indica* and *japonica*. (C) Comparison of PBN among accessions with different haplotypes in two subpanels, *indica* and *japonica*. (D) Comparison of SBN among accessions with different haplotypes in two subpanels, *indica* and *japonica*. (E) Comparison of GNPP among accessions with different haplotypes in two subpanels, *indica* and *japonica*. \* indicates the haplotype is the same as NPB. Others in the pie-chart mean the haplotypes with a frequency of less than ten. The i and j behind Hap in (C-E) indicate *indica* accessions and *japonica* accessions with relevant haplotypes, respectively. Different lowercase letters indicate significant differences among accessions with different haplotypes based on Duncan's new multiple-range test ( $p < 0.05$ ).
